# Supplementary material for: Extraction, Isolation, Structural Characterization and Anti-Tumor Properties of an Apigalacturonan-Rich Polysaccharide from the Sea Grass Zostera caespitosa Miki
Source: PubMed Central journal article supplement (PMC4483652; doi:10.3390/md13063710), 2015-06-11
Supplement: marinedrugs-13-03710-s001.pdf [file marinedrugs-13-03710-s001.pdf]

## Supplementary Information

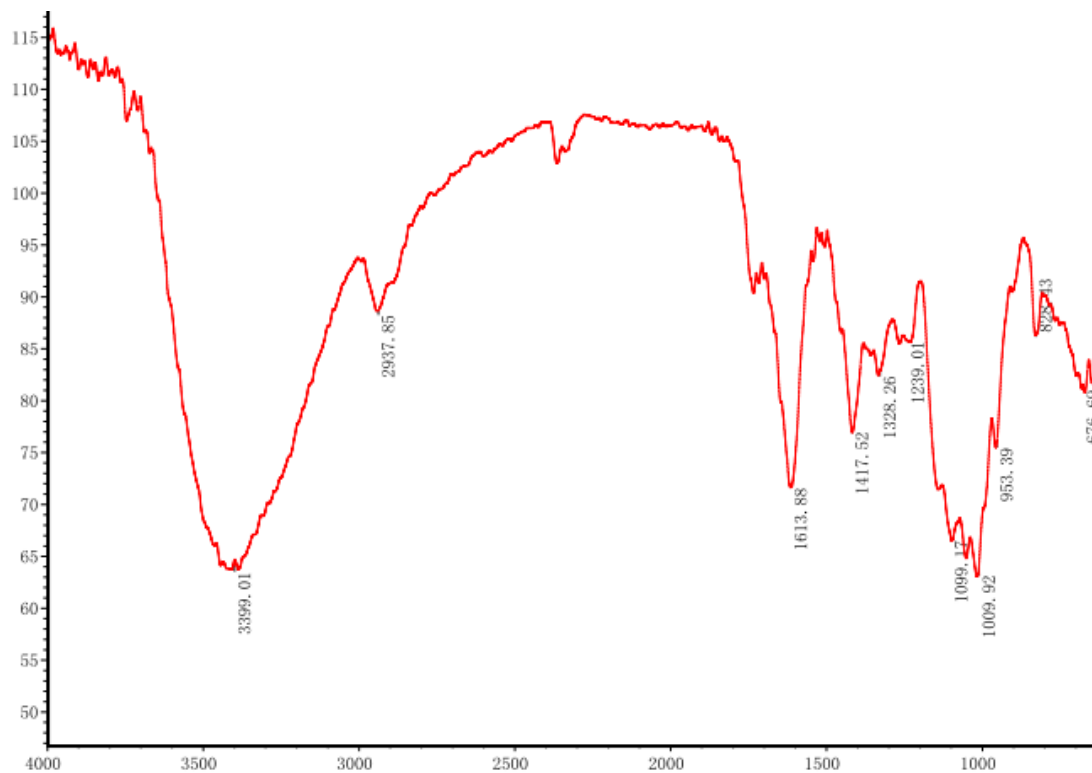

**Figure S1.** Infrared absorption spectrum of ZCMP.

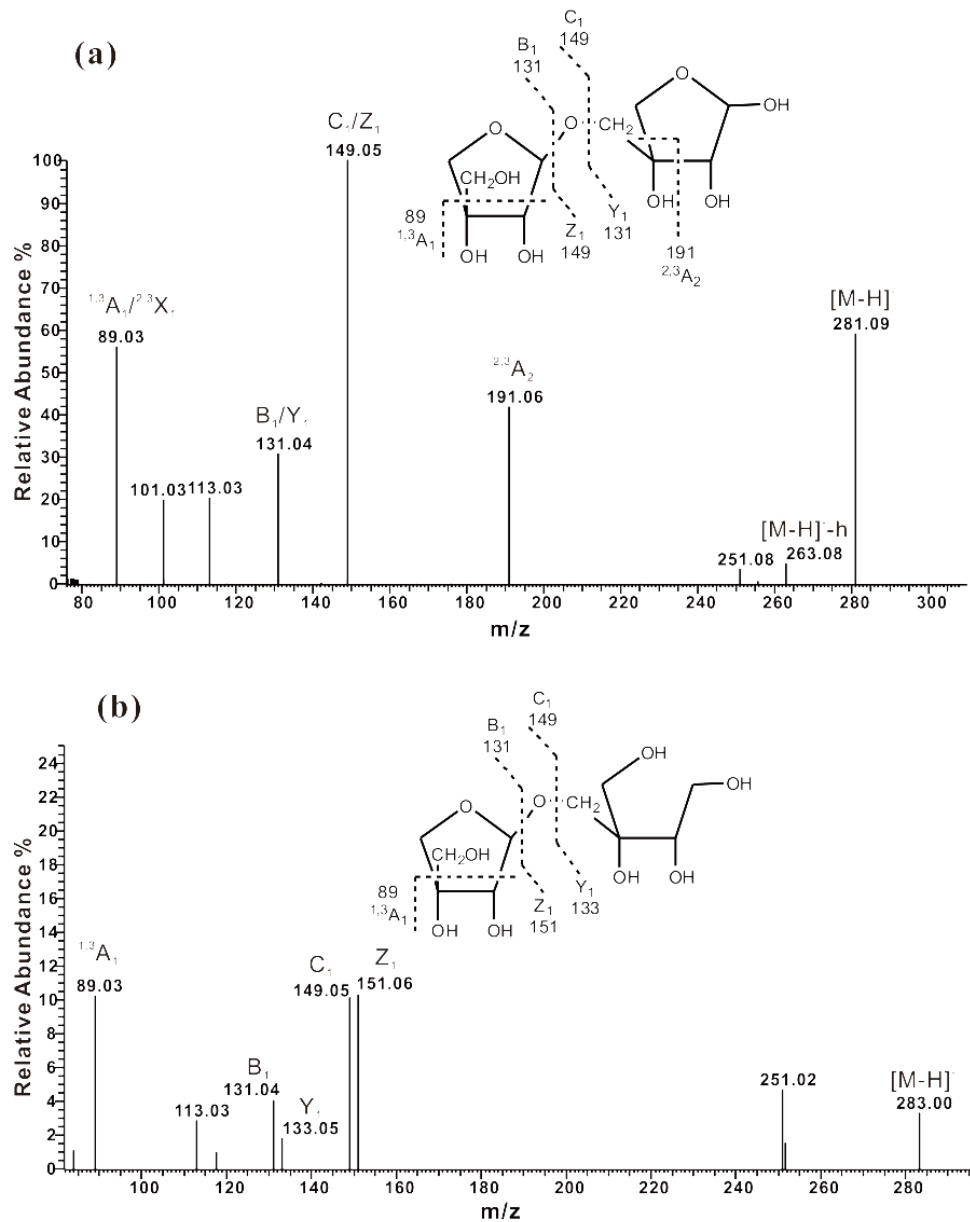

**Figure S2.** Negative-ion ESI-CID-MS<sup>2</sup> product-ion spectra of disaccharide  $\text{Api}_2$  from ZCMP-S. **(a)** Sequence analysis of disaccharide  $\text{Api}_2$  at  $m/z$  281; **(b)** Sequence analysis of disaccharide alditol at  $m/z$  283.

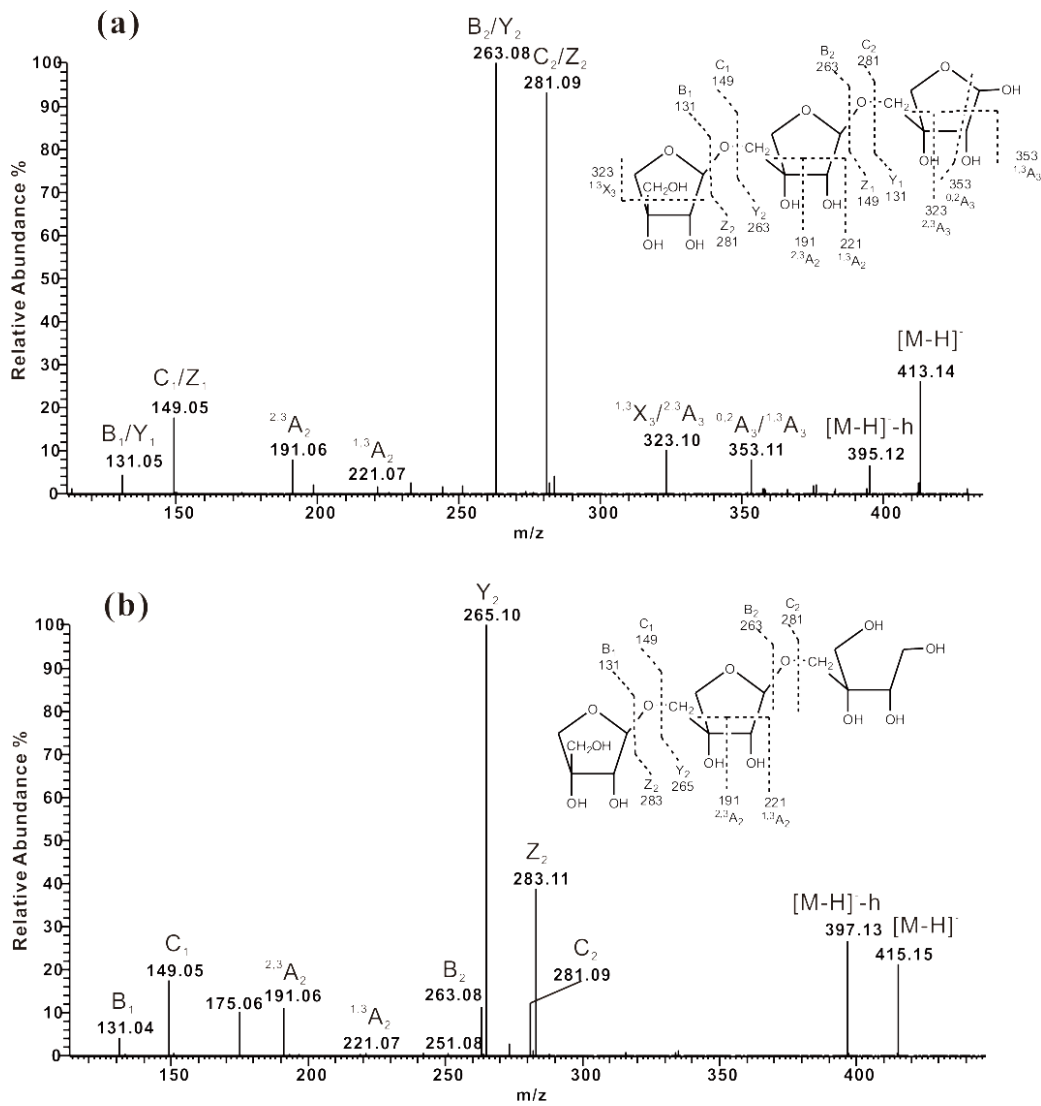

**Figure S3.** Negative-ion ESI-CID-MS<sup>2</sup> product-ion spectra of trisaccharide Ap<sub>13</sub> from ZCMP-S. **(a)** Sequence analysis of trisaccharide Ap<sub>13</sub> at *m/z* 413; **(b)** Sequence analysis of trisaccharide alditol at *m/z* 415.

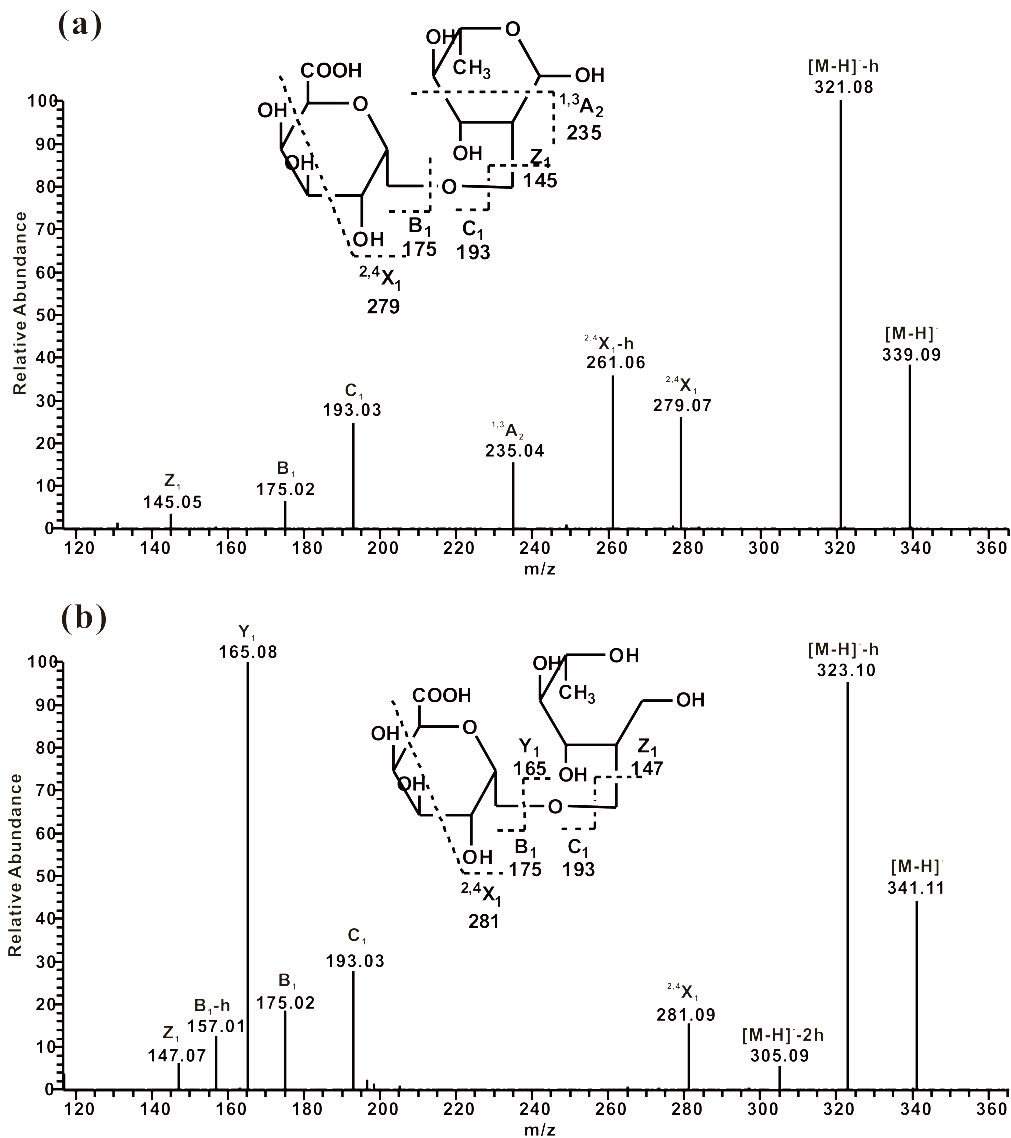

**Figure S4.** Negative-ion ESI-CID-MS<sup>2</sup> product-ion spectra of disaccharide GalA-Rha from ZCMP-PS. **(a)** Sequence analysis of disaccharide GalA-Rha at  $m/z$  339; **(b)** Sequence analysis of disaccharide alditol at  $m/z$  341.
